# Supplementary material for: Impulsivity across severe mental disorders: a cross-sectional study of immune markers and psychopharmacotherapy
Source: Springer Nature journal article supplement (doi:10.1186/s12888-023-05154-4), 2023-09-07
Supplement: MOESM1 [file 26015944]

**Table S1** Demographic and clinical characteristics of the IL-1RA and sTNFR1 subsample

|                        | <b>SCZ</b> | <b>BD</b> | <b>HC</b> | <b>p</b> <sup>SCZ versus HC</sup>       | <b>p</b> <sup>BD versus HC</sup> | <b>p</b> <sup>SCZ versus BD</sup> |
|------------------------|------------|-----------|-----------|-----------------------------------------|----------------------------------|-----------------------------------|
| Total N = 240          | N = 55     | N = 32    | N = 174   |                                         |                                  |                                   |
| <b>N (%)</b>           |            |           |           |                                         |                                  |                                   |
| Male                   | 26 (76)    | 15 (47)   | 104 (60)  | 0.07                                    | 0.17                             | 0.01                              |
| Use of antipsychotics  | 31 (91)    | 16 (50)   | NA        | NA                                      | NA                               | <0.001                            |
| Use of anticonvulsants | 1 (3)      | 6 (19)    | NA        | NA                                      | NA                               | 0.04                              |
| Lithium use            | 2 (6)      | 8 (25)    | NA        | NA                                      | NA                               | 0.03                              |
| Use of antidepressants | 6 (18)     | 9 (28)    | NA        | NA                                      | NA                               | 0.31                              |
| <b>Median (IQR)</b>    |            |           |           |                                         |                                  |                                   |
| Age                    | 25 (10)    | 30 (18)   | 31 (13)   | p <sup>Kruskal-Wallis test</sup> = 0.18 |                                  |                                   |
| BIS-11 total score     | 67 (18)    | 67 (20)   | 58 (11)   | <0.001                                  | <0.001                           | 0.95                              |
| PANSS total score      | 63 (15)    | 39 (11)   | NA        | NA                                      | NA                               | <0.001                            |
| CDSS                   | 4 (6)      | 3 (4)     | NA        | NA                                      | NA                               | 0.99                              |
| YMRS                   | 2 (3)      | 2 (4)     | NA        | NA                                      | NA                               | 0.86                              |
| GAF-F                  | 40 (13)    | 54 (19)   | NA        | NA                                      | NA                               | <0.001                            |

BD bipolar disorder; BIS-11, Barratt Impulsiveness scale; CDSS, Calgary Depression Scale for Schizophrenia; GAF-F, Global Assessment of Functioning; HC, healthy participant group; IQR, interquartile range; NA, not applicable; PANSS, Positive and Negative Syndrome Scale; SCZ, schizophrenia or schizophreniform disorder; YMRS, Young Mania Rating Scale.

p values based on chi-squared-, Wilcoxon rank-sum-, or Kruskal-Wallis tests with post hoc pair-wise comparisons.
